# Supplementary figures and images for: Methylated Cell-Free DNA Sequencing (MeD-seq) of LpnPI Digested Fragments to Identify Early Progression in Metastatic Renal Cell Carcinoma Patients on Watchful Waiting
Source: MDPI journal article supplement (doi:10.3390/cancers15051374), 2023-02-21

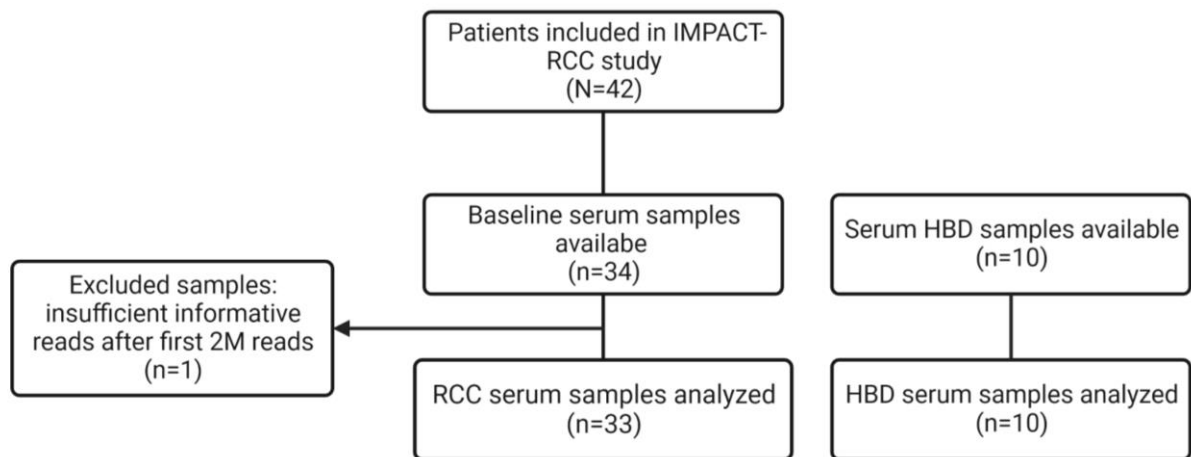

**Figure S1.** Flow chart of study samples

Supplement: s1 [file s1]
